# Supplementary material
Source: PubMed Central journal article supplement (PMC3203707)
Supplement: cr201170x5.pdf [file cr201170x5.pdf]

**Supplementary information, Table S5** Primer sequences used for off-target analysis

| Site # | Primers (5'-3')                               | Site # | Primers (5'-3')                               |
|--------|-----------------------------------------------|--------|-----------------------------------------------|
| 1      | AAGGACTGAATGGGCAGTTG<br>AAAGGCAAGGAAGGAAGGAG  | 18     | CACCCTTCCTTGTGTCTGGT<br>AACAGAACACGTGCCACATC  |
| 2      | ACGGCTACCTTCGAAACAGA<br>GCACACAGGCAATTAGAGCA  | 19     | AATTGCAGAGCCCATCAAAC<br>TGGGTTAAGAATCCGACTGC  |
| 3      | TCTGGGGGAAAACCTTGATGA<br>CTGGCACACAGTAGGCACTC | 20     | GCAACCAATGCTACAGCTCA<br>TGACCCAGTGCAAGTGAAGAG |
| 4      | CTAAGCCCATGTCTCCCGTA<br>ACTGGTGTTCCTGGGACTG   | 21     | TCCTTTCCAGCCAAAATCAC<br>CAGGGCTTCCTTCTGTCAAG  |
| 5      | CCTGATCCAGCAGGGAATAA<br>TCCATTCCAATGTGCTTCAA  | 22     | TCATTGCCTGCTCAGTTTTG<br>GGCTGTAATGTAGGCCGGTA  |
| 6      | CTGCTTTCCAAGGGGTTGTA<br>GCTTTGTTATGCAAGCACGA  | 23, 24 | CTGGTCCCCTTTCTCTACCC<br>GCATTTCACTGGGGACAAGT  |
| 7      | GGTGTGACAGAGAGGGGTGT<br>AGAAGGGGAGCTCCATGAAT  | 25     | GACATGGGTGACATCATGGA<br>TCTGCATGGCAACAGAGAAC  |
| 8      | TGACCCATACTGGCTCATCA<br>CTTTTCAAACATCCCGCATC  | 26     | TTGCAGTTGACTCTGCATCC<br>CTGCTTTTGGCTTTTCTTGG  |
| 9      | GGCTTTGTGCAGTCTCTTCC<br>CATCATCTCCTCCCAGCATT  | 27, 28 | CATTGTTGAGGCCTTGGATT<br>TGGTCCAAATCAAGGAGGAG  |
| 10     | GGACATGGGAGGAGTTCAGA<br>AGGTGGTAACGTGGGAACAG  | 29     | TCCTCGTTAGTGGAGCTGAAA<br>AGGATGGGAAAAGGAGGAA  |
| 11     | GAGGTTCTGGGCTAGGAGT<br>TCTTGCTGTGCCTGTCTGG    | 30     | TTTCTTTTTGCCTCCACCAC<br>TGGAAAGTCCTCATCCAAGG  |
| 12, 13 | GCCCCGTGTACATCTCCTTA<br>CATGTTGTGCAATGTGTGGA  | 31, 32 | CCCTTACCACTTCCCTCTCC<br>TCCTCACCTTTTGTCCAAC   |
| 14     | TTCTCCTGCGAGTTCCTGTT<br>GGTCCCTGGTTAATGGGATT  | 33, 34 | CAGCCTGCAAATCAAATGA<br>CTGTAGGGCTCTGGCTCAAC   |
| 15, 17 | TCTCACTGCCAGGACTGTTG<br>GGAGAAGGGAGTGTGATGGA  | 35, 36 | TATCCAAGGCCCAACTTCTG<br>CCGAGCTACTGCAGTGATGA  |
| 16     | GGACCTTGCAGCAGTTTAGG<br>ACGTCCAGCATCAGGGATAC  | 37     | GGCTCTGTGAGGATGCAAGT<br>GAACTGCTGTTGTAGGCCTGT |
